# Supplementary material for: A Novel Regimen for Treating Melanoma: MCL1 Inhibitors and Azacitidine
Source: MDPI journal article supplement (doi:10.3390/ph14080749), 2021-07-30

Supplemental figure S1

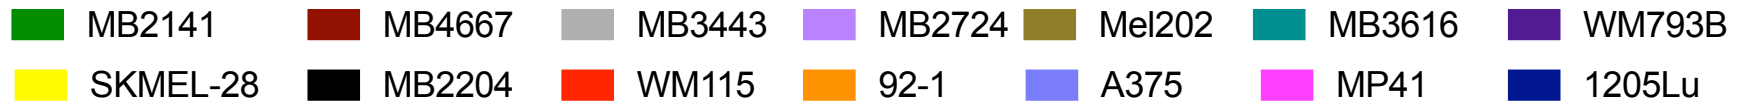

A)

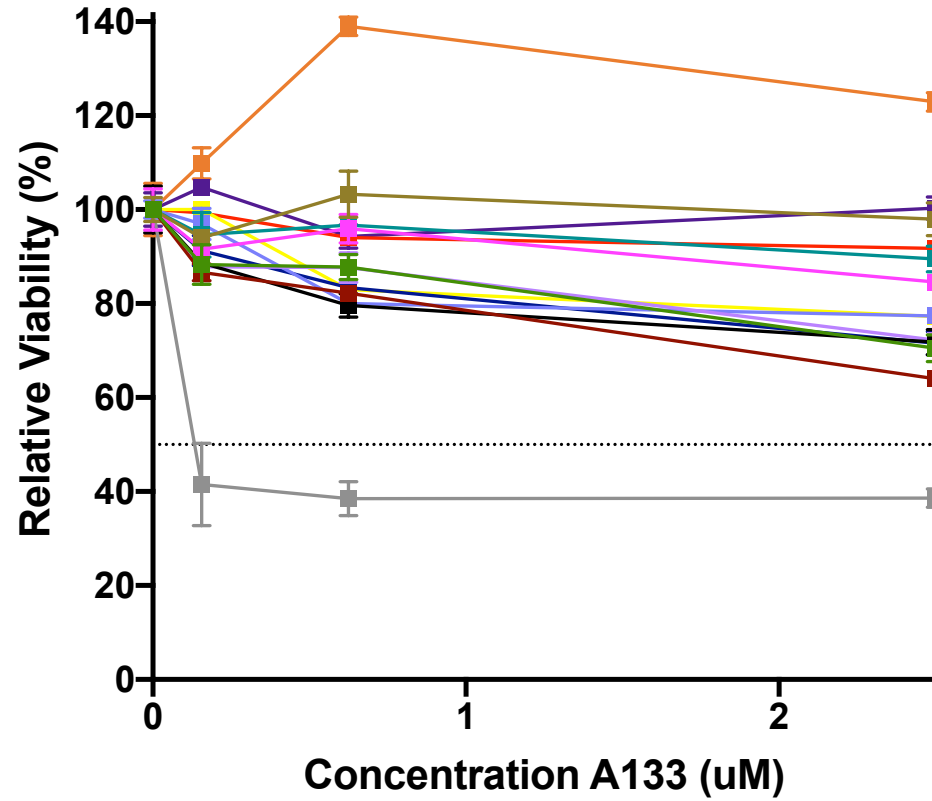

B)

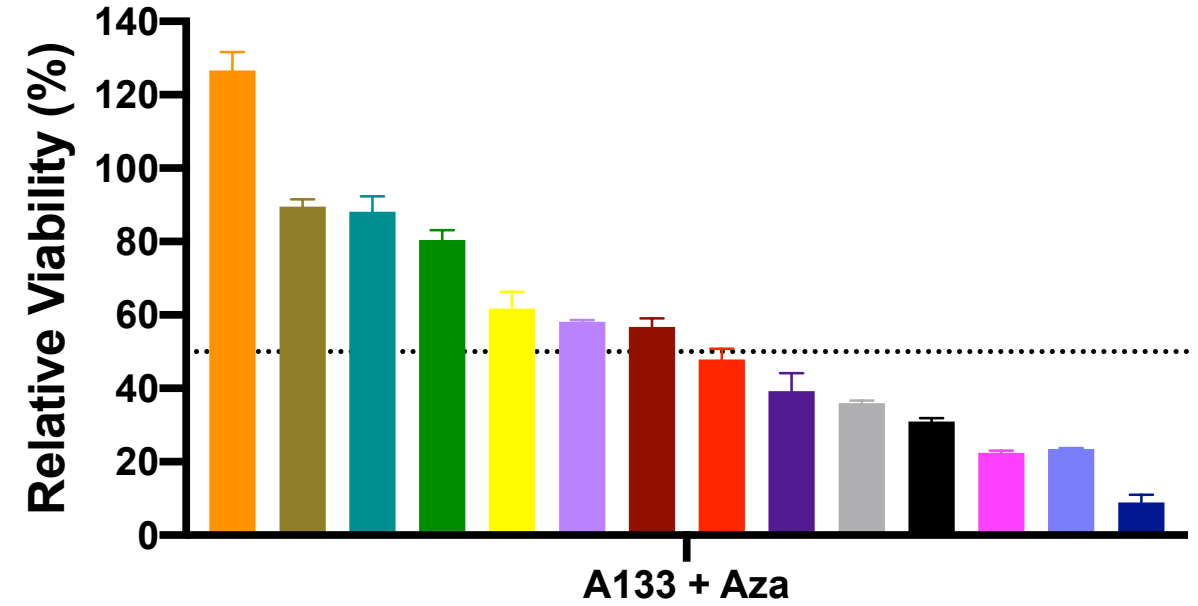

Supplemental figure S2

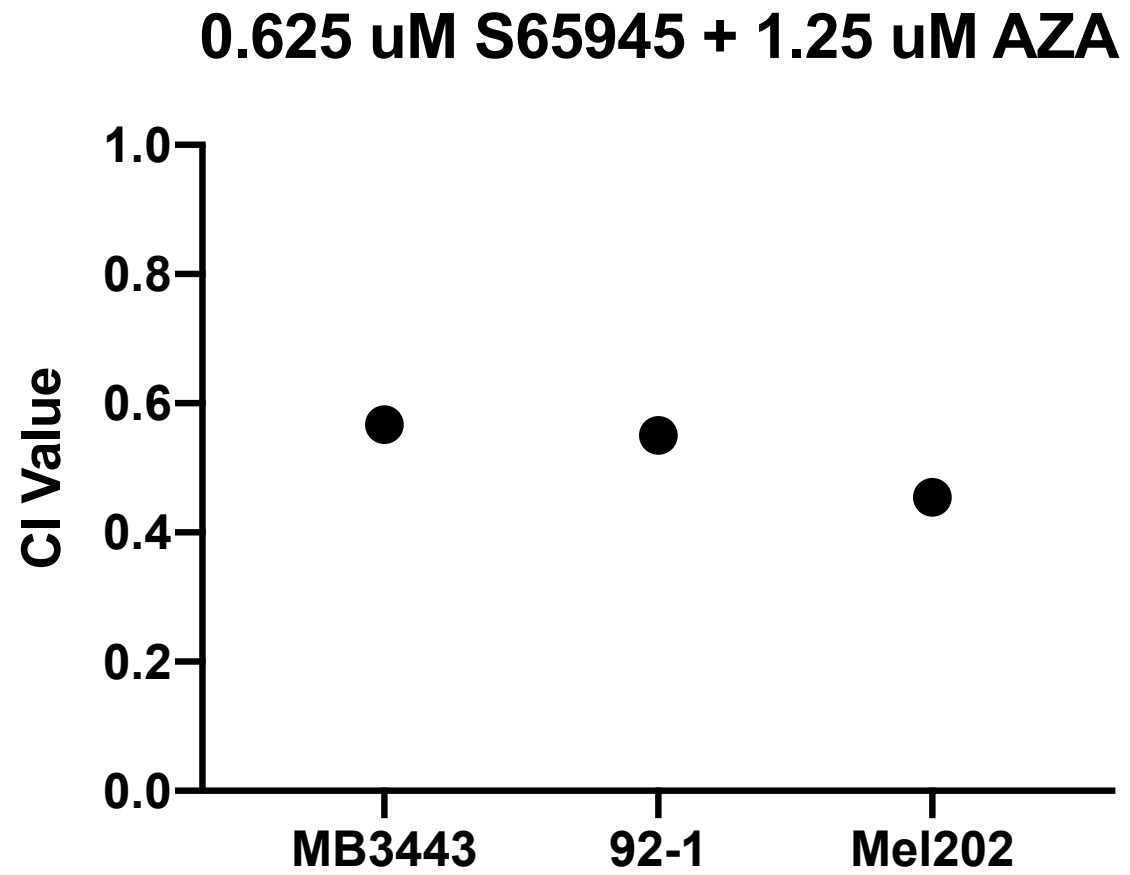

# Supplemental figure S3

A)

MP46

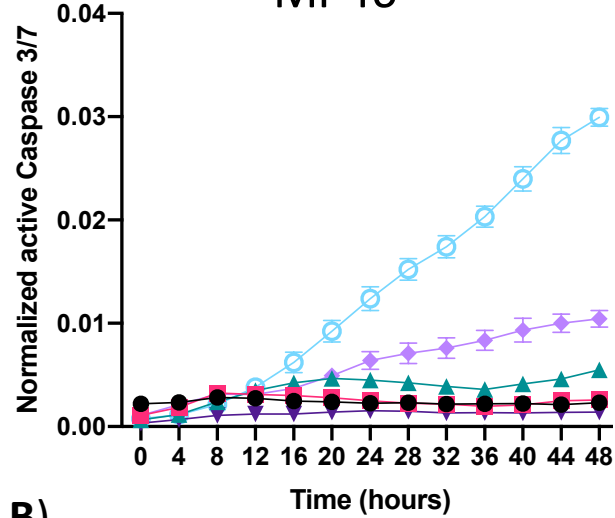

MP41

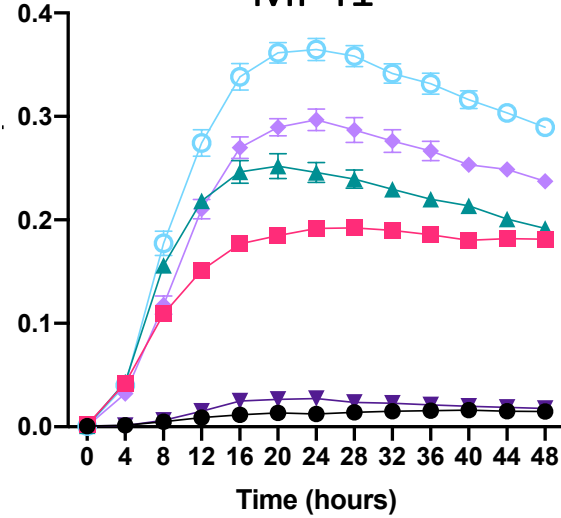

MB2141

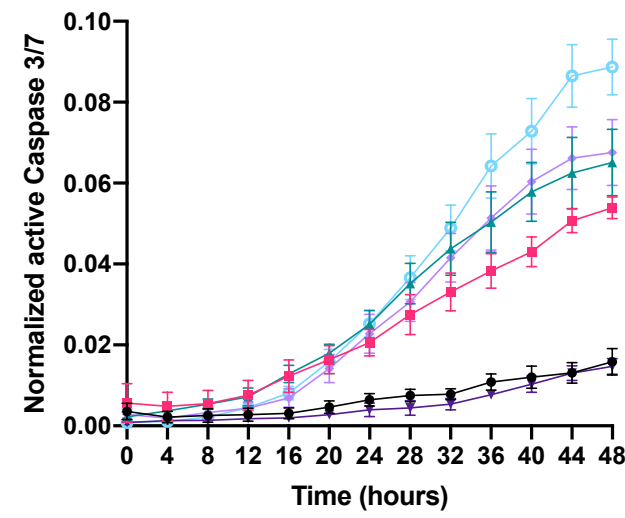

MB4667

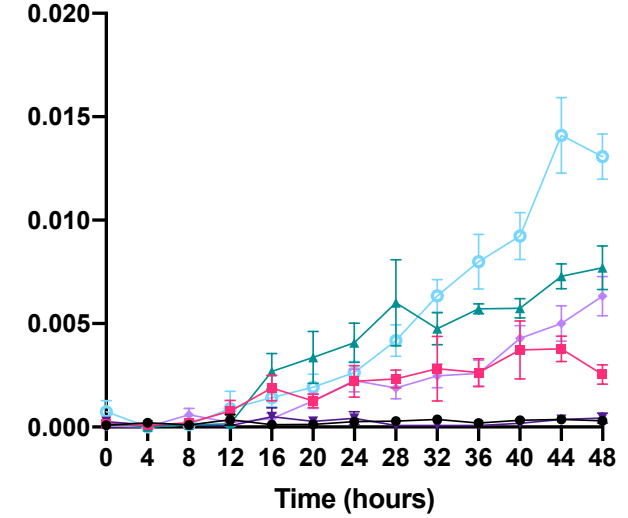

B)

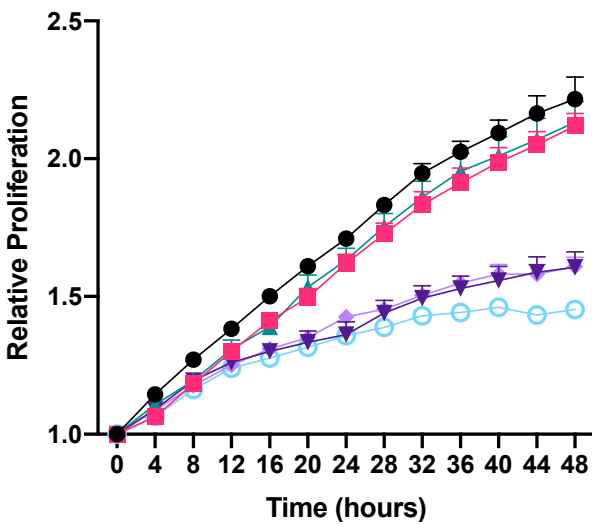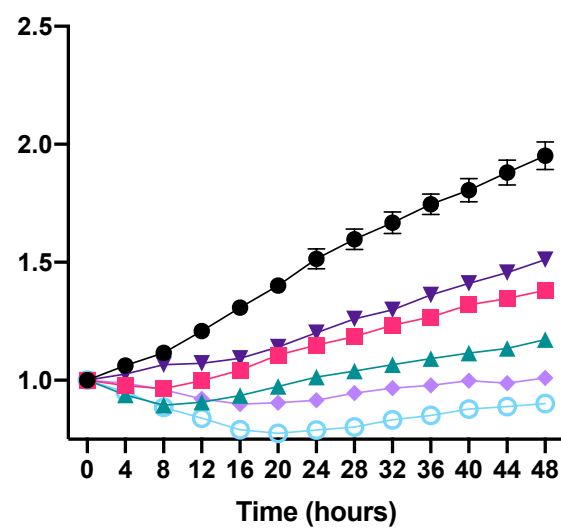

0.156 uM dose MCL1i

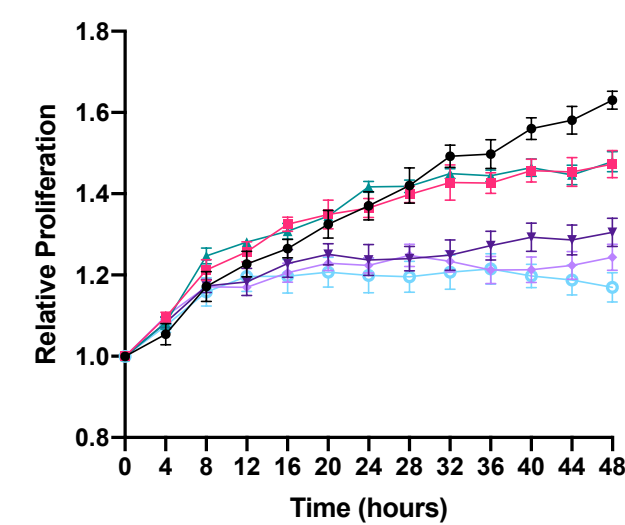

2.5 uM dose MCL1i

—●— DMSO —■— S63 —▲— S64 —▼— Aza —◆— S63 + Aza —○— S64 + Aza

Supplemental figure S4

A)

# IC50 By Mutation status

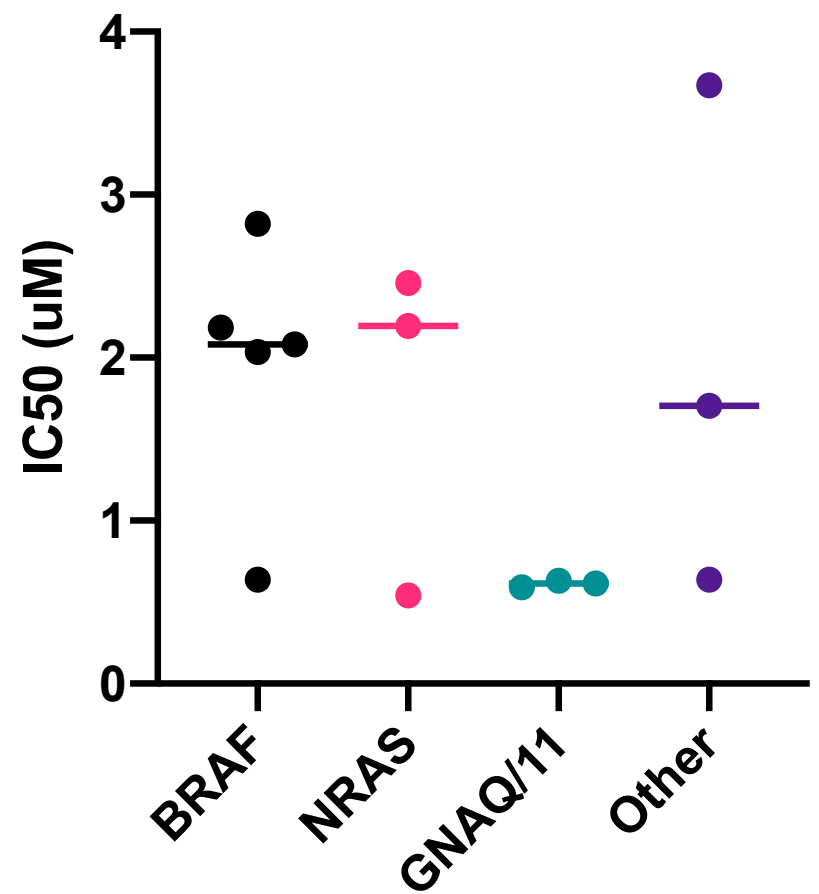

B)

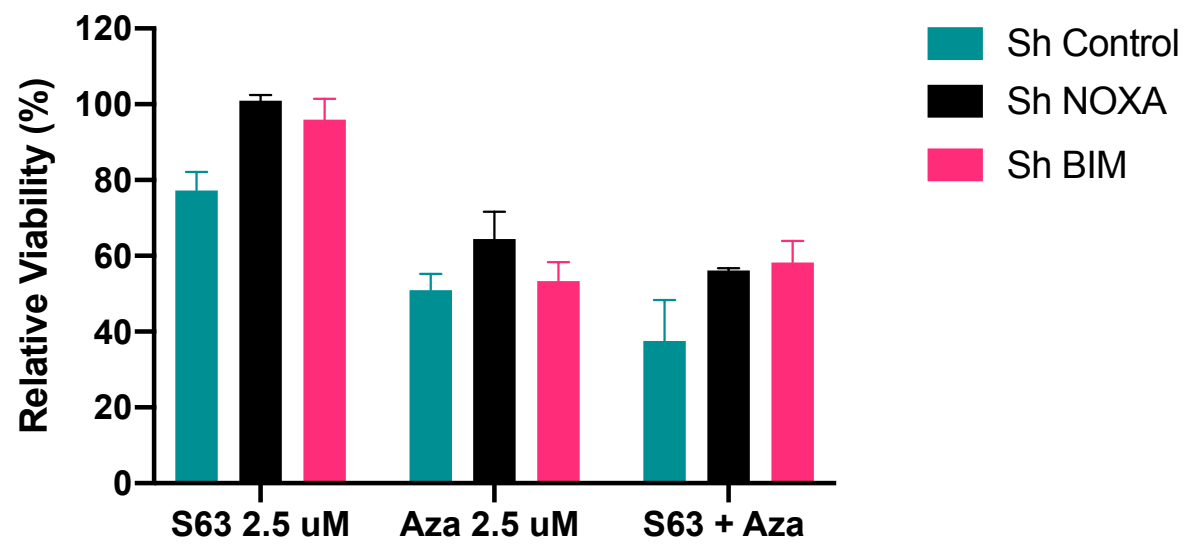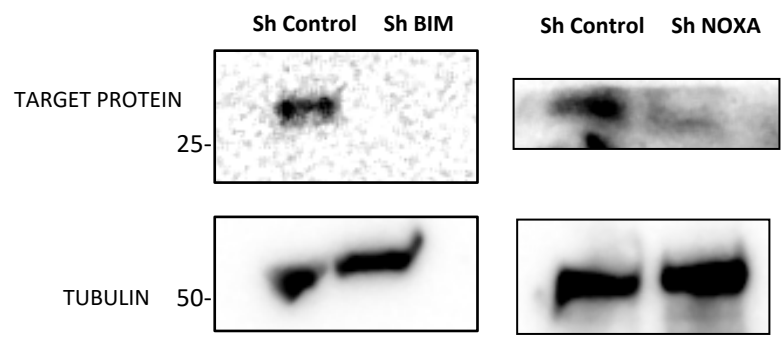

Supplemental figure S5

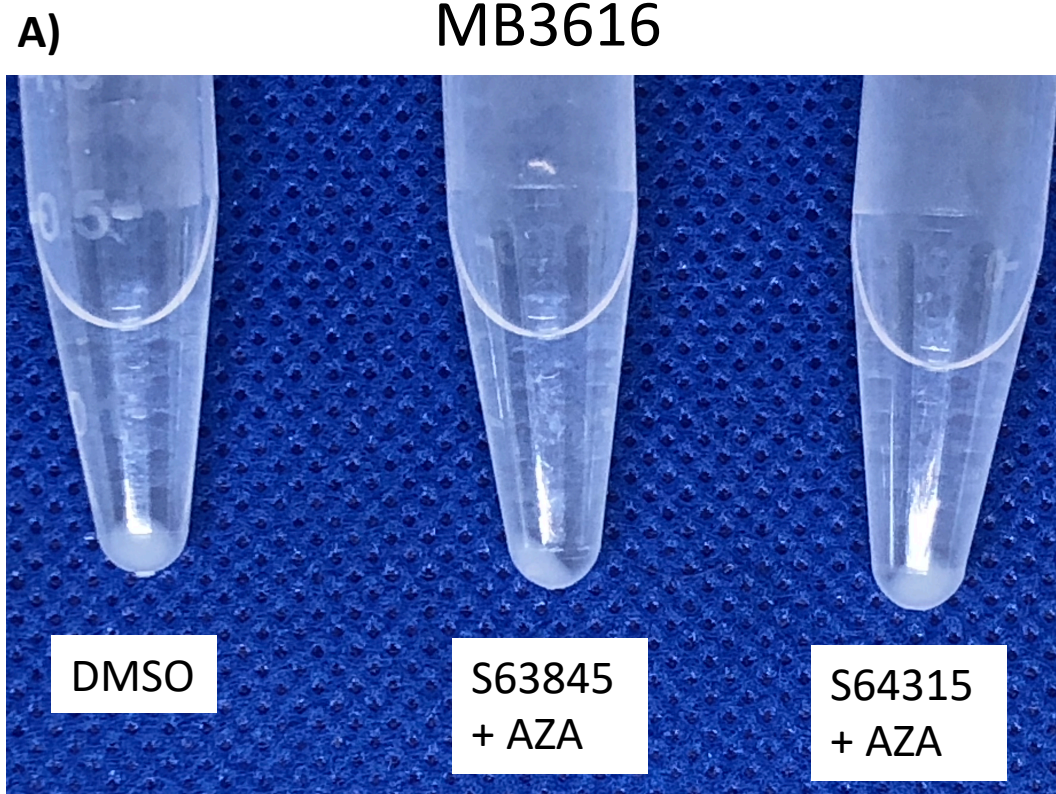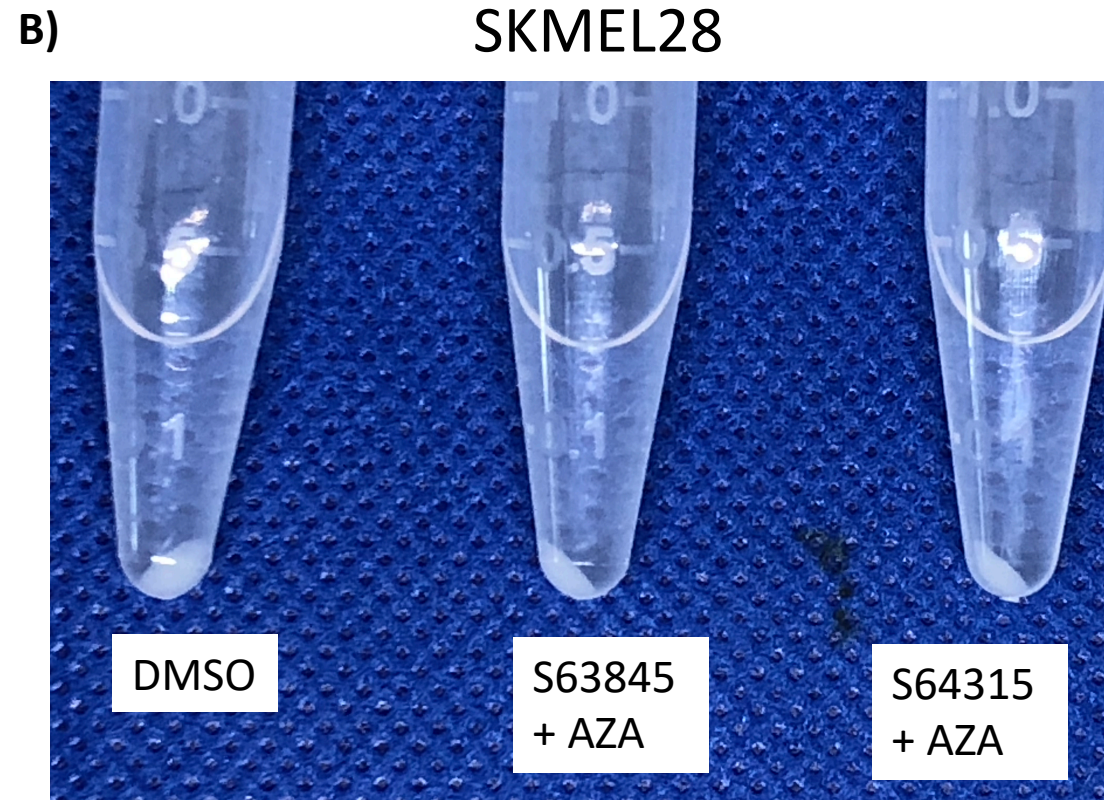

Supplement: s1 [file s1]
